# Supplementary material for: Genome-Wide Identification of the Pectate Lyase Gene Family in Potato and Expression Analysis under Salt Stress
Source: MDPI journal article supplement (doi:10.3390/plants13101322), 2024-05-11
Supplement: s1 [file s1]

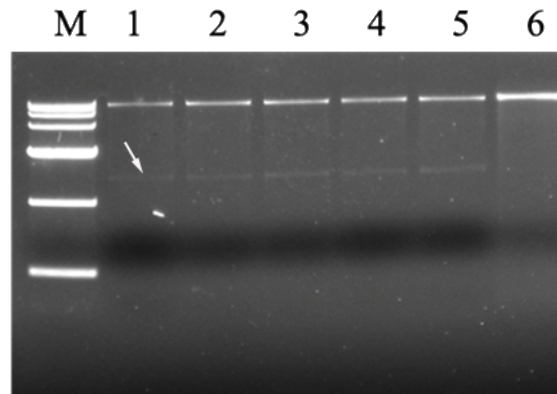

**Figure S1:** Enzyme digestion of the plant expression vector super1300-StPL18; M: DL15000; 1-5: Enzyme digestion of the recombinant plasmid super1300-StPL; 6. super1300-StPL18 plasmid.
